# Supplementary material for: Wnt11 Is Required for Oriented Migration of Dermogenic Progenitor Cells from the Dorsomedial Lip of the Avian Dermomyotome
Source: PubMed Central journal article supplement (PMC3966816; doi:10.1371/journal.pone.0092679), 2014-03-26
Supplement: pone.0092679.s002.pdf [file pone.0092679.s002.pdf]

## Table S1

Target sequences for *Wnt11* RNAi:

Target 1:

Forward\_Wnt11-217

5' GATCCGCACGGGAAGTCATAAAGATTCAAGAGATCTTTATGACTTCCCGTGCTTTTTTGAATTCA 3'

Reverse\_Wnt11-217

5' AGCTTGAATTCAAAAAAGCACGGGAAGTCATAAAGATCTCTTGAATCTTTATGACTTCCCGTGCG 3'

Target 2:

Forward\_Wnt11-326

5' GATCCGGAGTCAGCATTGTGTATTTCAAGAGAATACACAAATGCTGACTCCTTTTTTGAATTCA 3'

Reverse\_Wnt11-326

5' AGCTTGAATTCAAAAAAGGAGTCAGCATTGTGTATTCTCTTGAAATACACAAATGCTGACTCCG 3'

Target 3:

Forward\_Wnt11-761

5' GATCCGCAAATACCTCGTGCCAAATTCAAGAGATTTGGCACGAGGTATTTGCTTTTTTGAATTCA 3'

Reverse\_Wnt11-761

5' AGCTTGAATTCAAAAAAGCAAATACCTCGTGCCAAATCTCTTGAATTTGGCACGAGGTATTTGCG 3'

Target 4:

Forward\_Wnt11-1034

5' GATCCAGAGGACTGTCGAGAGATATTCAAGAGATATCTCTCGACAGTCCTCTTTTTTGAATTCA 3'

Reverse\_Wnt11-1034

5' AGCTTGAATTCAAAAAAGAGGACTGTCGAGAGATATCTCTTGAATATCTCTCGACAGTCCTCTG 3'
