# Supplementary material for: Wnt11 Is Required for Oriented Migration of Dermogenic Progenitor Cells from the Dorsomedial Lip of the Avian Dermomyotome
Source: PubMed Central journal article supplement (PMC3966816; doi:10.1371/journal.pone.0092679), 2014-03-26
Supplement: pone.0092679.s003.pdf [file pone.0092679.s003.pdf]

## Table S2

### Real -Time PCR

Total RNA was extracted and reverse transcribed. Upstream and reverse primers are summarized here.

| Gene           | Primer sense [5'-3']        | Primer antisense [5'-3']   | amplicon size [bp] | Accession Number |
|----------------|-----------------------------|----------------------------|--------------------|------------------|
| 18s rRNA       | catggtgaccacgggtgac         | ttccttgatgtgtagccg         | 82                 | 53990            |
| GAPDH          | cagcctcgcccgtagaca          | cgctcctggaagatggtgat       | 234                | 126012538        |
| $\beta$ -actin | gccaacacagtgtctgtgtgtggtac  | cacacagagtacttgcgctcaggagg | 137                | 145966868        |
| actg1          | accaacagcagacttccag gat     | agactggcaagaaggagtgg taa   | 79                 | 48762677         |
| ubc            | aggtaaacaggaagacagacgta     | tcacaccaagaacaagcac a      | 80                 | 149254583        |
| wnt11          | ctgaatcagacgcaaacactg taaac | ctctctccaggtaagcaggta g    | 205 bp             | NM_009519.2      |
| twist1         | agctacgccttctccgtct         | tccttctctggaacaatgaca      | 123 bp             | NM_011658.2      |
| twist2         | catgtccgcctcccacta          | ggtgccgaaagtcacagc         | 123 bp             | NM_007855.2      |
| Fgf10          | cgggaccaagaatgaaga ct       | gcaacaactccgattccac        | 69 bp              | NM_008002.4      |
| Krt5           | cagagctgaggaacatgca g       | cattctcagccgtggtacg        | 512 bp             | NM_027011.2      |
